# Supplementary figures and images for: PreMSIm: An R package for predicting microsatellite instability from the expression profiling of a gene panel in cancer
Source: PubMed Central journal article supplement — Comput Struct Biotechnol J. 2020 Mar 19;18:668–75. doi: 10.1016/j.csbj.2020.03.007 (PMC7113609; doi:10.1016/j.csbj.2020.03.007), 2020-03-19

Figure S2

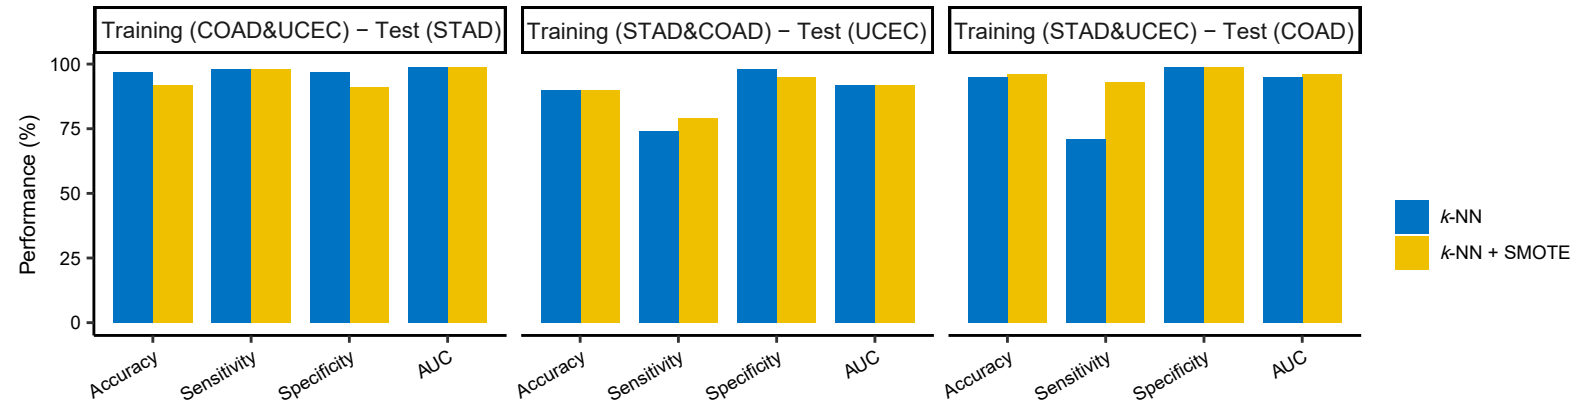

Supplement: mmc2.pdf [file mmc2.pdf]
